# Supplementary material
Source: PubMed Central journal article supplement (PMC3311365)
Supplement: 1111305109_pnas.1111305109_SI.pdf [file 1111305109_pnas.1111305109_SI.pdf]

# Supporting Information

Qiang et al. 10.1073/pnas.1111305109

## SI Text

**SI Supporting Methods. Peptide synthesis and fibril formation.** D23N-A $\beta_{1-40}$  (DAEFRHDSGY<sub>10</sub>EVHHQKLVFF<sub>20</sub>AENVGS NKGA<sub>30</sub>IIGLMVGGVV<sub>40</sub>) was synthesized and purified as described previously (1). Monomeric D23N-A $\beta_{1-40}$  was prepared by dissolving the lyophilized peptide in dimethyl sulfoxide at 5–8 mM, then diluting to 100  $\mu$ M in incubation buffer (10 mM sodium phosphate, pH 7.4, 0.01% NaN<sub>3</sub>) Parent fibrils were obtained by quiescent incubation at 6 °C for 7 d. TE fibrils were produced by eight cycles of sonication on ice (Branson model S-250A sonifier, 10% duty cycle, lowest power, 10 min) separated by 48 h incubation periods at 6 °C (Fig. S1A). Fibrils after eight generations of seeded growth (Figs. S1B and C) were prepared as previously described (1), but at 6 °C and with 3 h incubation periods between generations. SFg2 fibrils were prepared as described in the main text.

**Development of structural models.** Atomic coordinates for an eight-molecule segment of an antiparallel D23N-A $\beta_{1-40}$  fibril were generated by restrained molecular dynamics and simulated annealing within Xplor-NIH (2). Only residues 15–40 were included. Potential energy functions included potentials representing distance restraints derived from 2D RAD spectra, 2D CHHC spectra, PITHIRDS-CT data, and REDOR data (see Table S2), and backbone dihedral angle restraints derived from <sup>13</sup>C chemical shifts (see Table S1). Standard bond length, bond angle, improper dihedral, and nonbonded repulsive potentials were also used.

For structures shown in Fig. 4 and Fig. S6, artificial uniaxial “residual dipolar coupling” (RDC) restraints for backbone N-H bond vectors in residues 17–21 and 31–35 were also included. RDCs were not measured experimentally, of course, but the RDC potential term in Xplor-NIH provides a simple means of restraining N-H bond directions in  $\beta$ -strand segments to be approximately parallel to an external axis (which then becomes the long fibril axis), as they should be in any cross- $\beta$  structure. The RDC potential does not prevent the cross- $\beta$  structure from developing a gradual twist about the fibril axis, as commonly observed in electron microscopy studies of amyloid fibrils (3–5). To produce the desired alignment of N-H bonds, the artificial RDC values for residues 17–21 and 31–35 were set equal to twice the anisotropy ( $D_a$ ) of the alignment tensor.

Interstrand O-H<sub>N</sub> and O-C distance restraints were used to represent interstrand hydrogen-bonding patterns identified from the 2D CHHC spectra. These distance restraints were assigned to pairs of D23N-A $\beta_{1-40}$  molecules in a way that is consistent with an antiparallel  $\beta$ -sheet. For example, for odd  $j$ , O-H<sub>N</sub> restraints were applied between O of I31 in molecule  $j$  and H<sub>N</sub> of M35 in molecule  $j + 1$ , and between O of I32 in molecule  $j + 1$  and H<sub>N</sub> of L34 in molecule  $j + 2$ ; for even  $j$ , O-H<sub>N</sub> restraints were applied between O of I31 in molecule  $j$  and H<sub>N</sub> of M35 in molecule  $j - 1$ , and between O of I32 in molecule  $j - 1$  and H<sub>N</sub> of L34 in molecule  $j - 2$ .

Xplor-NIH runs began with eight copies of the peptide in an extended conformation, placed far apart from one another (40 Å center-of-mass spacings) with antiparallel alignments. A brief period of high-temperature dynamics (3,000 K, 5,000 simulation steps) was performed, including dihedral angle potentials (scaling factor equal to 5), but not including distance potentials or RDC potentials. Annealing was then carried out in two stages. In the first stage (3,000 K to 500 K,  $5 \times 10^6$  total steps), distance and dihedral angle potentials were applied, but not RDC potentials. The scaling factor for distance potentials was ramped from 1 to

20. The scaling factor for dihedral angle potentials was set to 20. In the second stage (500 K to 10 K,  $3.9 \times 10^6$  total steps), the scaling factor for dihedral angle potentials was set to 20 and the scaling factor for distance potentials was ramped from 20 to 200. RDC potentials were applied, with a scaling factor that was ramped from 1 to 5. Energy minimization was performed after the second annealing stage. Forty Xplor-NIH runs were performed, yielding three structures with no violations of the distance restraints (0.5 Å threshold). The lowest-energy structure was then selected as the initial condition for a second iteration of the two-stage annealing protocol. Simulation conditions were as described above, but high-temperature dynamics were performed at 1,500 K, the first annealing stage proceeded from 1,500 K to 500 K in  $1.0 \times 10^6$  steps, and the second annealing stage proceeded from 500 K to 10 K in  $7.8 \times 10^5$  steps. Forty Xplor-NIH runs were performed. The ten structures with lowest restraint energies were retained as the final structures and deposited in the Protein Data Bank as PDB file 2LNQ. Fig. S6 shows superpositions of the ten final structures. Root-mean-squared deviations (rmsd) from the mean of the ten structures are 0.86 Å for backbone atoms and 1.50 Å for non-hydrogen atoms in residues 16–34 of the central pair of molecules. The lowest-energy structure is displayed in Fig. 4. Total target energies range from 136.53 to 137.89, in Xplor-NIH units. No violations of bond angles, bond lengths, improper angles, or RDC restraints occur in the final structures (thresholds of 5°, 0.05 Å, 5°, and 0.5 Hz, respectively). No violations of distance restraints occur (0.5 Å threshold beyond the limits in Table S2; 240 total restraints). An average of  $20.8 \pm 2.4$  nonbonded distance (i.e., van der Waals contacts) violations occur (0.2 Å threshold), with the largest violation being 0.39 Å. An average of  $15.0 \pm 1.6$  violations of dihedral angle restraints occur (5° threshold beyond the TALOS+limits; 280 total restraints), with the rms violation being  $2.13^\circ \pm 0.039^\circ$  and the largest violation being 8.5°.

Inclusion of artificial RDC restraints as described above has the effect of reducing the rmsd values in the final structures, but otherwise does not affect the structures qualitatively. When structures are calculated with the same protocol, but without RDC restraints, the rmsd for residues 16–34 in the central pair of molecules is 0.94 Å for backbone atoms and 1.58 Å for non-hydrogen atoms (including the 10 lowest-energy structures from 40 Xplor-NIH runs). Rmsd values between the lowest-energy structure calculated with RDC restraints and the 10 lowest-energy structures calculated without RDC restraints are 0.98 Å for backbone atoms and 1.62 Å for non-hydrogen atoms.

**Cytotoxicity measurements.** Cultures of dissociated hippocampal neurons were prepared from embryonic day 18 Sprague Dawley (Harlan Sprague Dawley) rats as previously described (6). Briefly, hippocampal cells were mechanically dissociated by trituration following 0.05% trypsin-EDTA (Invitrogen) treatment and were seeded into polyethyleneimine-coated 35 mm dishes at a density of 10,000 cells/cm<sup>2</sup>. The culture medium consisted of Eagle's minimum essential medium containing 10 mM sodium bicarbonate, 1% glucose, 1 mM L-glutamine, 20 mM KCl, 1 mM sodium pyruvate, and 10% (v/v) heat-inactivated fetal bovine serum (Sigma). After a 4–6 h period to allow cell attachment to the substrate, the culture medium was replaced with Neurobasal medium (Life Technologies) containing B27 supplements (Invitrogen) in a humidified atmosphere (6% CO<sub>2</sub>/94% room air) at 37 °C. Experiments were performed on cells that had been in culture for 7 d. Prior to addition to cell cultures, D23N-A $\beta_{1-40}$













**Table S1.**  $^{13}\text{C}$  NMR chemical shifts (relative to tetramethylsilane) in SFg2 D23N-A $\beta_{1-40}$  fibrils and backbone dihedral angles predicted by TALOS+

| Residue | chemical shift (ppm) |               |              |               |               |                 | predicted $\phi, \psi$ ( $^\circ$ )* |
|---------|----------------------|---------------|--------------|---------------|---------------|-----------------|--------------------------------------|
|         | CO                   | C $_{\alpha}$ | C $_{\beta}$ | C $_{\gamma}$ | C $_{\delta}$ | C $_{\epsilon}$ |                                      |
| Q15     | 171.1                | 51.3          | 30.8         | 32.1          | 175.2         |                 |                                      |
| K16     | 170.7                | 52.7          | 34.4         | 22.5          | 27.3          | 38.8            | -122 $\pm$ 16, 130 $\pm$ 14          |
| V18     | 170.2                | 58.2          | 32.6         | 18.8          |               |                 | -132 $\pm$ 13, 139 $\pm$ 18          |
| F19     | 170.8                | 53.1          | 41.0         |               |               |                 | -123 $\pm$ 17, 133 $\pm$ 17          |
|         | 172.3                | 49.0          | 39.2         |               |               |                 |                                      |
| F20     | 169.8                | 53.0          | 40.3         |               |               |                 | -128 $\pm$ 13, 134 $\pm$ 17          |
| A21     | 171.8                | 47.8          | 20.6         |               |               |                 | -124 $\pm$ 20, 143 $\pm$ 15          |
|         | 172.1                | 47.6          | 22.4         |               |               |                 |                                      |
| E22     | 170.7                | 52.6          | 34.4         | 34.4          | 179.0         |                 | -131 $\pm$ 14, 140 $\pm$ 13          |
| N23     | 171.0                | 49.6          | 39.6         | 171.0         |               |                 | -109 $\pm$ 16, 133 $\pm$ 13          |
| K28     | 173.3                | 53.5          | 29.8         | 21.8          | 26.1          | 39.1            |                                      |
| A30     | 172.6                | 48.4          | 20.1         |               |               |                 | -129 $\pm$ 23, 133 $\pm$ 12          |
| I31     | 171.5                | 57.3          | 39.0         | 24.9, 14.6    | 11.5          |                 | -126 $\pm$ 17, 131 $\pm$ 16          |
| I32     | 171.7                | 56.4          | 39.2         | 25.1, 14.9    | 11.4          |                 | -126 $\pm$ 16, 130 $\pm$ 22          |
| L34     | 171.2                | 51.1          | 43.7         | 23.9, 22.9    |               |                 | -128 $\pm$ 16, 132 $\pm$ 19          |
| M35     | 172.3                | 52.0          | 33.8         | 29.4          |               |                 | -122 $\pm$ 22, 136 $\pm$ 14          |
| V36     | 171.5                | 57.5          | 32.2         | 18.3          |               |                 | -123 $\pm$ 19, 138 $\pm$ 20          |
| G38     | 168.0                | 42.8          |              |               |               |                 |                                      |
| V39     | 172.1                | 58.7          | 31.2         | 18.4          |               |                 | -120 $\pm$ 34, 142 $\pm$ 19          |
| V40     | 177.2                | 58.3          | 31.7         | 18.1          |               |                 |                                      |

\*Dihedral angles for L17 ( $\phi, \psi = -120 \pm 16^\circ, 130 \pm 14^\circ$ ) and G33 ( $\phi, \psi = -118 \pm 25^\circ, 145 \pm 26^\circ$ ) were also predicted by TALOS+ and used in Xplor-NIH calculations.

**Table S2.** Summary of structural restraints used in the development of molecular models for SFg2 D23N-A $\beta_{1-40}$  fibrils

| Restraint                                                                                                                                                                                                                                                                                                    | Value                                                                                                                             | Experimental basis                                                       |
|--------------------------------------------------------------------------------------------------------------------------------------------------------------------------------------------------------------------------------------------------------------------------------------------------------------|-----------------------------------------------------------------------------------------------------------------------------------|--------------------------------------------------------------------------|
| Backbone $\phi$ and $\psi$ angles                                                                                                                                                                                                                                                                            | Values and uncertainties given in Table S1*                                                                                       | TALOS+predictions from $^{13}\text{C}$ NMR chemical shifts               |
| Interstrand backbone hydrogen bonding for the following residue pairs: V18/F20, I31/M35, and I32/L34                                                                                                                                                                                                         | 1.5–1.7 Å for interstrand O-H <sub>N</sub> distances between hydrogen-bonded residues;<br>2.5–2.7 Å for interstrand O-N distances | Nonsequential C $_{\alpha}$ /C $_{\alpha}$ crosspeaks in 2D CHHC spectra |
| Contacts between the following atom pairs: F19C $_{\zeta}$ /I32C $_{\delta}$ , F19C $_{\zeta}$ /I32C $_{\gamma 2}$ , F19C $_{\zeta}$ /L34C $_{\gamma}$ , A21C $_{\alpha}$ /I32C $_{\delta}$ , A21C $_{\beta}$ /I32C $_{\delta}$ , I32C $_{\gamma 2}$ /L34C $_{\alpha}$ , I32C $_{\gamma 2}$ /L34C $_{\beta}$ | 3.0–7.0 Å F19/I32 and A21/I32<br>3.0–9.0 Å for I32/L34<br>3.0–6.0 Å for F19/L34                                                   | Nonsequential interresidue crosspeaks in 2D RAD spectra*                 |
| Contacts between the following atom pairs: A30C $_{\beta}$ /G38C $_{\alpha}$ , K28CO/V40C $_{\gamma 1}$ , K28C $_{\zeta}$ /V40C $_{\gamma 1}$ , K28C $_{\zeta}$ /V40C $_{\beta}$ , K16C $_{\epsilon}$ /E22C $_{\delta}$ , K16C $_{\gamma}$ /E22C $_{\delta}$ , and K16C $_{\delta}$ /E22C $_{\delta}$        | 3.0–7.0 Å                                                                                                                         | Nonsequential interresidue crosspeaks in 2D RAD spectra†                 |
| Intermolecular F19-F19 and G33-G33 CO-CO distances between neighboring $\beta$ -strands                                                                                                                                                                                                                      | 4.5–5.5 Å                                                                                                                         | PITHIRDS-CT $^{13}\text{C}$ - $^{13}\text{C}$ recoupling data            |
| Intermolecular A30C $_{\beta}$ -V36N and A21C $_{\beta}$ -L17N distances between neighboring $\beta$ -strands                                                                                                                                                                                                | 4.9–5.5 Å                                                                                                                         | REDOR $^{15}\text{N}$ - $^{13}\text{C}$ recoupling data                  |
| Alignment of backbone N-H bond vectors for residues 17–21 and 31–35 with a single external axis‡                                                                                                                                                                                                             | Artificial residual dipolar couplings (see <i>Supporting Methods</i> )                                                            | Cross- $\beta$ structure indicated by electron diffraction               |

\*Treated as intramolecular contacts for simplicity, although the 2D RAD data do not directly distinguish intramolecular side chain–side chain contacts from contacts between side chains of neighboring molecules within a  $\beta$ -sheet.

†Treated as intermolecular because intramolecular contacts between these atom pairs would be inconsistent with the  $\beta$ -strand conformations of residues 16–22 and 30–36.

‡Chosen for their  $\beta$ -strand conformation and involvement in antiparallel interstrand hydrogen bonds.
